# Supplementary material
Source: PubMed Central journal article supplement (PMC4916913)

## Supplemental Figure 1

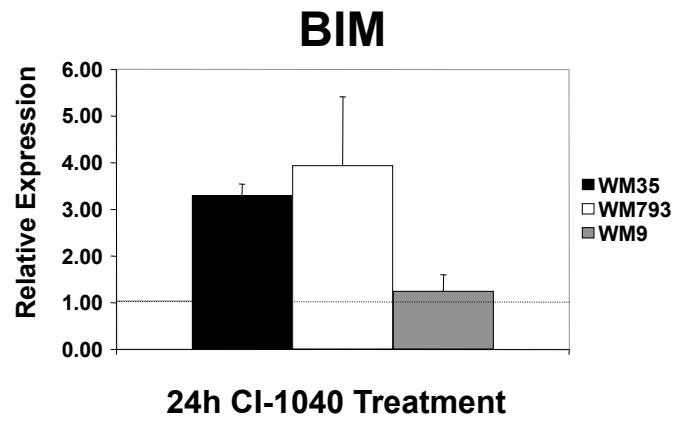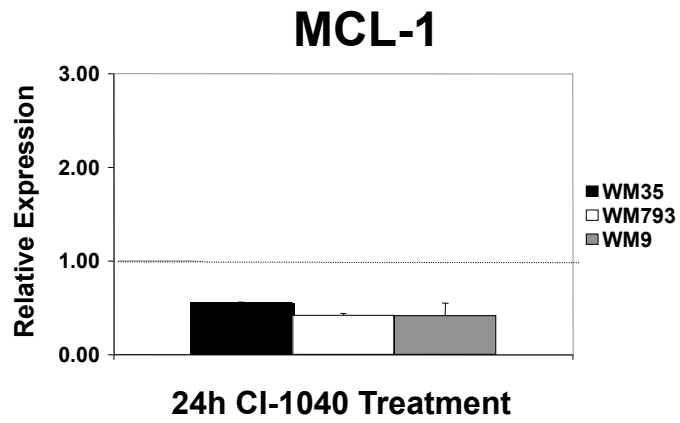

## Supplemental Figure 2

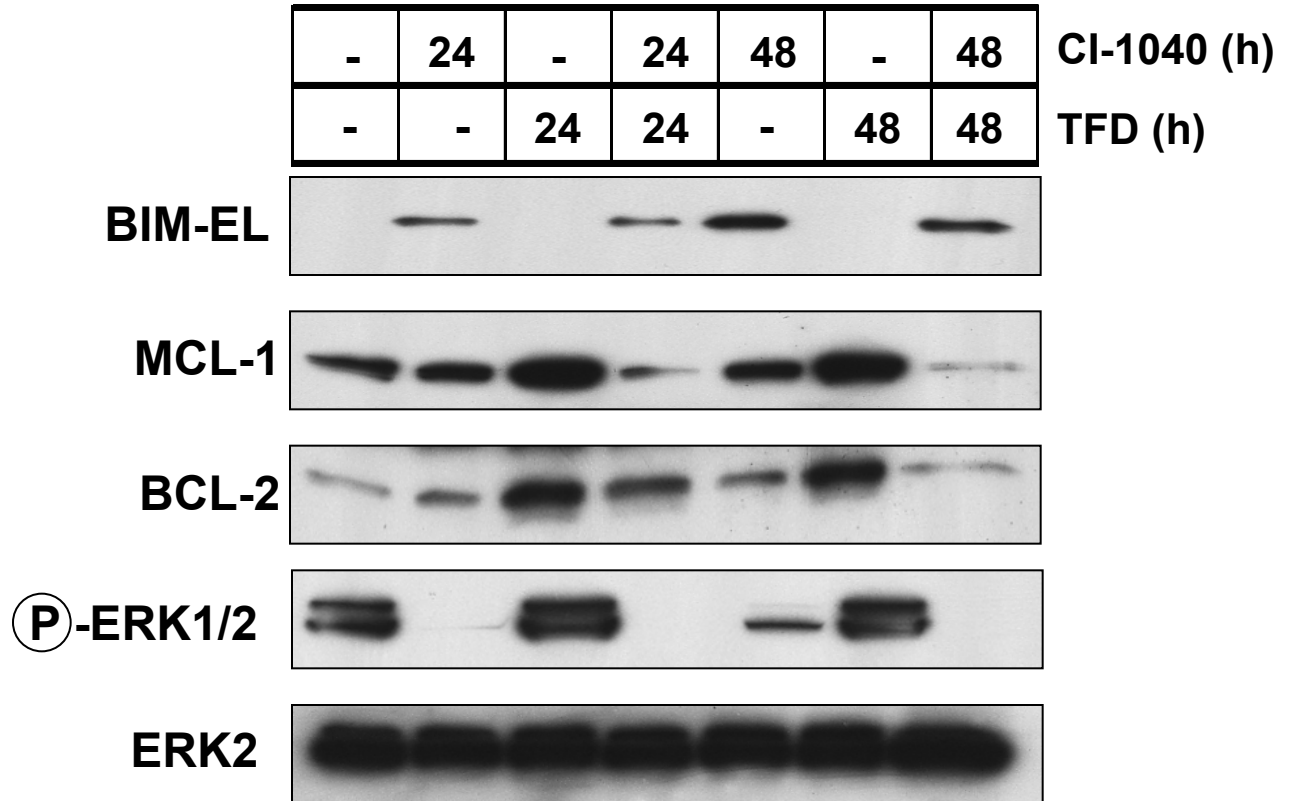

Supplement: NIHMS793428-supplement-Supplemental_Figs_1_2.pdf [file NIHMS793428-supplement-Supplemental_Figs_1_2.pdf]
